1 **Article**

2 **Knowledge, attitude, and practice towards lymphatic filariasis among inhabitants of an endemic town**  
3 **in Oyo State, Nigeria.**

4 **Authors Affiliation:** Jaiyeola, Taiwo Mofadeke<sup>1\*</sup>, Udoh, Ekerette Emmanuel<sup>2</sup> and Adebambo,  
5 Abiola Basirat<sup>3</sup>

6 <sup>1</sup> Lead City University Ibadan; [fadekejay@gmail.com](mailto:fadekejay@gmail.com)

7 <sup>2</sup> Society for Family Health Abuja, Nigeria; [ekerette01@gmail.com](mailto:ekerette01@gmail.com)

8 <sup>3</sup> Lead City University Ibadan; [basiratadebambo9@gmail.com](mailto:basiratadebambo9@gmail.com)

9 \*Correspondence: [fadekejay@gmail.com](mailto:fadekejay@gmail.com); +2348066580105

10  
11 **Abstract**

12 **Introduction**

13 The burden of lymphatic Filariasis (LF) popularly called *Ina orun* in southwest  
14 Nigeria is of serious concern and it calls for urgent attention. The study aimed at  
15 assessing the knowledge attitude and practice of inhabitants of two communities  
16 endemic with LF in Ibadan south-west Local Government Area (IBSWLGA) of Oyo  
17 State, Nigeria.

18 **Materials and methods**

19 A cross-sectional study was carried out using a semi-structured questionnaire.

20 **Results**

21 Out of 243 participants comprising of both male and female with a mean age of 35.01±  
22 8.53 years, 35% reported ever hearing about LF. The majority (73.3%) of the  
23 participants had an overall poor knowledge of the disease, while only 26.7% have  
24 good knowledge of the disease. 26.3% of the participants knew the main cause of LF  
25 while 74.9% did not know the disease is communicable. About half (50.6%) and 42.4%  
26 of the participants did not know the symptoms and the prevention practices  
27 respectively. Only 27.2% knew that mosquitoes play a major role in LF transmission.  
28 85.6% of the respondents were not aware of the Mass Drug Administration (MDA)  
29 program in the study area while 36.6% of participants did not know the role of MDA  
30 in preventing and controlling LF.  
31

32 **Conclusion**

33 These results indicate poor community knowledge, inadequate prevention practices,  
34 and a lack of awareness of available programmatic efforts that the population can  
35 benefit from to tackle continuous transmission of the lymphatic filariasis disease. In  
36 conclusion, with the present low status on the disease awareness and response,  
37 increased sensitization and community interventions on LF are necessary and this  
38 calls for urgent attention.

39 **Keywords:** Lymphatic filariasis, knowledge, attitude, practice, mass drug  
40 administration, neglected tropical diseases, and Nigeria

41  
42 1. Introduction

43 Lymphatic filariasis (LF), commonly called ‘elephantiasis’ is one of the most  
44 debilitating neglected diseases. It is a filarial infection caused by nematode  
45 worms *Wuchereria bancrofti*, *Brugia malayi*, or *timori*. The disease is  
46 transmitted to humans through the bite of infected mosquito species of the  
47 genera *aedes*, *anopheles*, *culex*, and *mansoni* (1). The infection can be acquired  
48 in childhood and can cause hidden damage to the lymphatic system. LF is  
49 currently of great public health concern in many countries of the world with  
50 up to eighty-three countries and territories being endemic, and 39 of these  
51 countries are in Sub-Saharan Africa. Nigeria has the highest number of  
52 people at risk of the infection globally followed by the Democratic Republic  
53 of Congo, Tanzania, Ethiopia and Kenya (2).

54 Up to 1.3 billion people are estimated to be at risk of developing the disease  
55 (3). About 68 million people are infected globally with 36 million being  
56 microfilariae carriers and 40 million symptomatic (4). Over 40 million people

57 have been debilitated and disfigured by the disease with up to 90% being  
58 infected with *Wuchereria bancrofti* and the remainder with *Brugia malayi* or  
59 *Brugia timori* (1). Furthermore, an estimated 946 million people who live in  
60 parts of southeast Asia and sub-Saharan Africa where mosquito-borne  
61 filariasis is endemic are therefore at risk of the infection (5). After malaria, LF  
62 ranks in the list of vector-borne parasitic diseases (6). LF was recognized as  
63 the second leading cause of permanent disability. Nigeria ranks third in the  
64 list of countries endemic with LF in the world with an estimate of 22 million  
65 cases and 80 million people at risk of the disease (7). The disease has also  
66 been linked to huge economic losses affecting up to 88% of economic activity  
67 as a result of the disability linked to hydrocele in men. In addition, LF also  
68 has severe negative impact on the psychological, economic and social life of  
69 the affected population (8,9). Symptoms of LF range from acute such as  
70 filarial fever presenting as recurring pain attacks and vomiting to more  
71 chronic symptoms such as lymphodema that could progress to gross  
72 enlargement of the limbs (popularly called elephantiasis), chronic swellings  
73 on the scrotum otherwise called hydrocele (10).

74 In year 2000, WHO launched the global programme to eliminate lymphatic  
75 filariasis (GPELF) with the aim to interrupt transmission of lymphatic  
76 filariasis by 2020. To achieve this elimination goal, WHO recommends that a  
77 minimum of 65% population coverage should be targeted for annual mass  
78 drug administration (4). Between year 2000 and 2012, GPLEF provided more  
79 than 4.5 billion treatments in 59 countries thereby reducing the global

80 prevalence of LF by 59%, microfilaremia prevalence by 68%, hydrocele  
81 prevalence by 50%, and lymphoedema prevalence by 25% (5). In spite of this  
82 progress, 16 countries have not yet attained the recommended coverage and  
83 ten have not yet initiated MDA. This implies that around half of the  
84 countries affected are yet to implement the recommendations of the GPELF  
85 (4).

86 In Nigeria, a study carried out in Ilorin, Kwara state showed that the  
87 majority (82%) of the study participants had no awareness about LF and the  
88 true cause of the infection. The respondents of the survey reported a fair  
89 understanding of LF prevention and management (8). Another study done in  
90 Kano state, Nigeria reported poor knowledge of LF symptoms and  
91 transmission. In this study, only 12% of the respondents knew that mosquito  
92 can spread LF (11).

93 Assessing the knowledge, attitude and practices of citizens in endemic  
94 communities concerning the disease and its elimination is important to  
95 evaluate the control effort being carried out and provide information on the  
96 potential risks these communities remain exposed to. More so, data on  
97 awareness and response of endemic communities is useful for programming  
98 to reduce vector borne disease burden, as well as help in developing and  
99 implementing effective and sustainable control program for the disease. In  
100 addition, recognizing a community's participation in tackling the disease is  
101 very critical to the success of any elimination program. Therefore, this  
102 present study was carried out to assess the knowledge, attitude and practice

103 of the community residents about LF with regards to the causes,  
104 transmission, prevention and control practices.

## 105 **2. Materials and Methods**

### 106 *Study settings*

107 Ibadan South-west LGA is in Ibadan metropolis and is one of the 33 LGAs in  
108 the state. The LGA has an estimated population of 190,672 inhabitants (12).  
109 LF is endemic in the LGA with prevalence of 21% from the LGA surveillance  
110 records. The disease is co-endemic with onchocerciasis in this LGA. This  
111 study was cross-sectional in design. Total sample size was 243 and  
112 interviews were conducted for this number of participants. A multistage  
113 sampling technique was used to sample for the participants. Firstly, two  
114 wards were purposively selected out of the twelve wards in the LGA. These  
115 two wards were selected because of established cases of the disease in the  
116 wards from records in the disease surveillance office of the IBSWLGA. In the  
117 next stage, one community each was selected from each of the two wards.  
118 Finally, a systematic random sampling process was used to sample  
119 households in each of the selected communities. Respondents who met  
120 inclusion criteria in households selected were interviewed. The study  
121 population included males and females aged 18 years and above who had  
122 been resident in the two study communities for at least one year, and gave a  
123 written consent to participate in the study.

### 124 *Data collection and analysis*

125 A semi-structured questionnaire was developed and pretested in a different  
126 LF endemic area to ensure consistency, reliability, and appropriateness of  
127 language before the questionnaire was deployed for data collection in the  
128 study areas. The questionnaire was translated from English into the local  
129 language Yoruba for interviews with participants who did not understand  
130 English. Information from respondents captured with the questionnaire were  
131 socio-demographic characteristics, knowledge about LF including causes,  
132 signs and symptoms, mode of transmission, prevention and management of  
133 LF. Also, information on attitude and practices of respondents towards  
134 prevention and control of the disease, and participation in Mass Drug  
135 Administration (MDA) program was assessed. Data collection was done by  
136 trained interviewers who administered the questionnaire electronically using  
137 Kobocollect application on android devices.

138 Data was exported from Kobocollect into Statistical package for social  
139 sciences version 20. Data was cleaned and analyzed. Questions on  
140 knowledge relating to causes of LF, mode of transmission, prevention, and  
141 knowledge of control program through MDA were summed into a  
142 composite knowledge-score variable. Respondents whose total scores were  
143 less than the mean of the composite knowledge-score variable were classified  
144 as having poor knowledge, while respondents whose total scores were equal  
145 to or greater than the mean knowledge score were classified as having good  
146 knowledge. Questions related to practice towards LF and its elimination  
147 were also summed into a composite practice-score variable. Respondents

148 whose scores were less than the mean score were grouped as having poor  
149 practice towards LF, while those whose scores were equal to or greater than  
150 the mean were considered as having good practice towards LF. All results  
151 are presented using descriptive statistics using frequency and percentages.

### 152 3. Results

#### 153 3.1. Sociodemographic characteristics of respondents

154 Mean age of respondents was  $35.01 \pm 8.53$  years with males making 50.6%  
155 and female 49.4% of the sample population. More than half of the  
156 respondents were married (58.4%), while 30.9% were single. Majority were in  
157 skilled occupation (43.2%) and 32.9% were in unskilled occupation.  
158 Concerning the educational level of participants, about 40% reported to have  
159 completed secondary education, 17.3% had a tertiary education and 3.3%  
160 reported no education. About half of the respondents were Christians  
161 (49.8%) and 41.6% were Muslims, while 1.2% did not report having a  
162 religious affiliation. Majority of the respondents (60.1%) had resided in the  
163 study communities for more than ten years, 21% had been resident in the  
164 community for about 5-10 years, only a few (7.8%) had spent about a year in  
165 the study area. Table 1 shows the socio-demographic profile of the  
166 respondents.

167

168 **Table 1 Socio-demographic characteristics of respondents**

| Variable  | Frequency | % |
|-----------|-----------|---|
|           | N = 243   |   |
| Age group |           |   |

|                                            |     |      |
|--------------------------------------------|-----|------|
| 20-29                                      | 84  | 34.6 |
| 30-39                                      | 99  | 40.7 |
| 40-49                                      | 38  | 15.6 |
| 50-59                                      | 22  | 9.1  |
| <b>Sex</b>                                 |     |      |
| Males                                      | 123 | 50.6 |
| Females                                    | 120 | 49.4 |
| <b>Marital status</b>                      |     |      |
| Single                                     | 75  | 30.9 |
| Married/ Cohabiting                        | 146 | 60.1 |
| Divorced, separated /widowed               | 20  | 8.2  |
| No Response                                | 2   | 0.8  |
| <b>Occupation</b>                          |     |      |
| Professionals                              | 3   | 1.2  |
| Highly Skilled                             | 32  | 13.2 |
| Skilled                                    | 105 | 43.2 |
| Semi-skilled                               | 17  | 7.0  |
| Unskilled                                  | 80  | 32.9 |
| Unemployed                                 | 6   | 2.4  |
| None                                       | 8   | 3.3  |
| <b>Education</b>                           |     |      |
| No education                               | 8   | 3.3  |
| Some primary                               | 3   | 1.2  |
| Completed primary                          | 21  | 8.6  |
| Some secondary                             | 72  | 29.6 |
| Completed secondary                        | 97  | 39.9 |
| Tertiary                                   | 42  | 17.3 |
| <b>Religion</b>                            |     |      |
| Christianity                               | 121 | 49.8 |
| Islam                                      | 101 | 41.6 |
| Others                                     | 13  | 5.3  |
| No response                                | 8   | 3.2  |
| <b>Length of stay in Community (years)</b> |     |      |
| About 1                                    | 19  | 7.8  |
| >1-5                                       | 27  | 21.0 |
| >5-10                                      | 51  | 21.0 |
| >10                                        | 146 | 60.1 |

169

170

### 3.2 Knowledge of lymphatic filariasis among respondents

171

Our result showed that majority of participants had an overall poor

172

knowledge of LF (73.3%), with less than a third showing good knowledge of



173 LF from the analysis (26.7%) (Table 2). Only 35% of the study respondents  
174 had heard about the disease. Regarding respondents' knowledge on the  
175 symptoms of LF, only about one-third (33.3%) knew that LF may not show  
176 any sign, more than a third of the respondents correctly associated the  
177 disease with lymphedema (33.3%), elephantiasis (33.7%), hydrocele (30%)  
178 and about half (50.6%) of the study participants did not know any symptom  
179 of LF.

180 Only 26.3% of respondents knew that filarial worm from mosquito bites is  
181 the cause of LF. Meanwhile, other reasons like dirty environment (47.7%)  
182 and eating contaminated food (27.2%) were wrongfully given as the cause of  
183 LF, with up to 42.4% unaware of what the cause of LF was. Most of the  
184 respondents did not know whether LF can be transferred from one person to  
185 another (74.9%). Some respondents knew that mosquitoes play a major role  
186 in the transmission of the disease (27.2%). The participants also reported  
187 dirty environment (47.7%), eating contaminated food (35%), and sharing  
188 contaminated clothing (23.9%) as some of the modes of transmission of LF.  
189 Some respondents also attributed transmission of LF to blackfly bite (8.2%).  
190 The percentage that reported not knowing the mode of transmission of LF  
191 was 42%.

192 About on third (33.2%) of participants knew that LF could be prevented by  
193 avoiding mosquito bites, with 36.6% reporting that drugs for LF would help  
194 to control LF. Other reported measures such as keeping the environment  
195 clean (50.2%) wearing long clothing (19.8%), and using bed nets or  
196 insecticide (43.6%) were reported for LF prevention. Most of the respondents

197 did not know about the MDA program (85.6%) for the control of LF in the  
 198 community. Over half of the respondents mentioned that everyone in the  
 199 community should take drugs during MDA (59.3%) even though almost one-  
 200 third do not know who should take drugs during MDA (31.7%).

201  
 202 **Table 2 Knowledge of Lymphatic filariasis among respondents**

| <b>Overall Knowledge</b>                                                   | N          | %          |
|----------------------------------------------------------------------------|------------|------------|
| Poor                                                                       | 178        | 73.3       |
| Good                                                                       | 65         | 26.7       |
| <b>Specific knowledge variables</b>                                        | Yes        | No         |
| Ever heard about LF                                                        | 85 (35.0)  | 158 (65.0) |
| Knowledge related to symptoms                                              |            |            |
| LF may not show any signs                                                  | 81 (33.3)  | 162 (89.7) |
| Lymphedema as symptoms of LF                                               | 81 (33.3)  | (66.7)     |
| Elephantiasis as symptoms of LF                                            | 82 (33.7)  | 161 (66.3) |
| Scrotal swelling (Hydrocele) as a symptom                                  | 73 (30)    | 170 (70)   |
| Swollen breast as symptoms of LF                                           | 80 (32.9)  | 163 (67.1) |
| Do not know any symptom of LF                                              | 123 (50.6) | 120 (49.4) |
| Knowledge related to cause of LF                                           |            |            |
| Filarial worms in mosquito bite cause LF                                   | 64 (26.3)  | 179 (73.7) |
| Dirty environment                                                          | 116 (47.7) | 127 (52.3) |
| Eating contaminated food                                                   | 66 (27.2)  | 177 (72.8) |
| Sexual intercourse can cause LF                                            | 18 (7.4)   | 225 (92.6) |
| Do not know the cause of LF                                                | 103 (42.4) | 140 (57.6) |
| Knowledge related to mode of transmission                                  |            |            |
| Don't know whether LF can be transferred from one person to another        | 182 (74.9) | 61 (25.1)  |
| Mosquito bite play a major role in LF transmission                         | 66 (27.2)  | 177(72.8)  |
| Blackfly bite does not cause LF                                            | 223 (91.8) | 20 (8.2)   |
| Sharing contaminated clothing is not a means of transmission of LF         | 185 (76.1) | 58 (23.9)  |
| Do not know means of transmission                                          | 102 (42)   | 141 (58)   |
| Knowledge related to LF prevention and control                             |            |            |
| Avoiding mosquito bites by using bed nets/insecticides can help prevent LF | 81 (33.2)  | 162 (66.8) |

|     |                                                    |            |            |
|-----|----------------------------------------------------|------------|------------|
| 203 | Taking drugs during MDA can help control LF        | 89(36.6)   | 154 (63.4) |
| 204 | Keeping the environment clean                      | 122 (50.2) | 121 (49.8) |
| 205 | Wearing long clothing can help prevent LF          | 48 (19.8)  | 195 (80.2) |
| 206 | Do not know LF prevention practices                | 103 (42.4) | 140 (57.6) |
| 207 | Knowledge related to MDA for LF in community       |            |            |
| 208 | No knowledge of MDA in community                   | 208 (85.6) | 35 (14.4)  |
| 209 | Everyone in community should take drugs during MDA | 144 (59.3) | 99 (40.7)  |
| 210 | Children alone should take drugs during MDA        | 3 (1.2)    | 240 (98.8) |
| 211 | Adults alone should take drugs during MDA          | 5 (2.1)    | 238 (97.9) |
| 212 | Do not know who should take drugs during MDA       | 77 (31.7)  | 166 (68.3) |

210

211

212

213

214

215

216

217

218

219

220

221

222

223

224

225

226

227

228 **3.3 Attitude towards lymphatic filariasis and its elimination**

229 Attitude towards lymphatic filariasis was assessed and is presented in Table  
230 3. Most of the respondents reported they would be ashamed about the  
231 disease if they or a relation became sick from LF (53.5%). The percentage  
232 who reported that they would be sad/worried if they or their family  
233 members becomes sick from LF was 44.9%. Majority (69.1%) of the  
234 respondents think the disease needs treatment and treatment options  
235 reported include: use of modern medicines (19.8%), use of traditional  
236 medicines (5.3%) and use of both modern and traditional (74.9%) medicines.

237 **Table 3: Respondents' Attitude towards LF and its Control**

| 238 | <b>Variables</b>                                     | <b>N</b> | <b>%</b> |
|-----|------------------------------------------------------|----------|----------|
| 239 | Ever been sick/ knew a relative sick from LF         |          |          |
|     | Yes                                                  | 15       | 6.2      |
| 240 | No                                                   | 159      | 65.4     |
|     | NR                                                   | 69       | 28.4     |
| 241 | Feeling if me/ family member is sick from LF         |          |          |
| 242 | Sad/worried                                          | 109      | 44.9     |
|     | Ashamed                                              | 130      | 53.5     |
| 243 | Not bothered                                         | 4        | 1.6      |
|     | <b>Do you think you are at risk of developing LF</b> |          |          |
| 244 | Yes                                                  | 186      | 76.5     |
|     | No                                                   | 57       | 23.5     |
| 245 | <b>LF needs treatment</b>                            |          |          |
| 246 | Yes                                                  | 168      | 69.1     |
|     | No                                                   | 8        | 3.3      |
| 247 | Don't know                                           | 67       | 27.6     |
|     | <b>Treatment</b>                                     |          |          |
| 248 | Modern medicine                                      | 48       | 19.8     |
|     | Traditional medicine                                 | 13       | 5.3      |
| 249 | Both traditional and modern medicines                | 182      | 74.9     |

250 **3.4 Practice towards lymphatic filariasis and its elimination**

251 Practice towards LF control and elimination are presented in Table 4. Less  
252 than 10% of the respondents took drugs at the last round of MDA for LF.

253 Majority of the respondents didn't know about the MDA program for LF.  
 254 Other reasons given for not taking drugs include: I don't think I'm at risk of  
 255 LF (6.6%), taking other precautions (3.3%), no reason given (24.3%).  
 256 Activities undertaken by respondents to prevent LF reported includes:  
 257 avoiding mosquito bites (44%), keeping clean environment (23.9%) and  
 258 about 16% of the study participants don't do anything to prevent LF. Even  
 259 though, only a few of this study respondents reported being affected with  
 260 the disease (6.2%), more than half of this affected few visited traditional  
 261 homes for treatment. Practice towards LF and its control among the  
 262 respondents was generally poor with only 21.8% having a good practice  
 263 score.

264 **Table Respondents' practice towards LF and its Control**

| Variables                                | N   | %    |
|------------------------------------------|-----|------|
| <b>Received drugs at last round</b>      |     |      |
| Yes                                      | 20  | 8.4  |
| No                                       | 223 | 91.8 |
| <b>Why drug was not received</b>         |     |      |
| Didn't know about MDA                    | 157 | 64.6 |
| I take other precautions                 | 52  | 21.4 |
| No Reason                                | 34  | 14.0 |
| <b>Other Actions taken to prevent LF</b> |     |      |
| Avoiding mosquito bite                   | 107 | 44   |
| Keeping clean environment                | 58  | 23.9 |
| Don't do anything                        | 40  | 16.5 |
| <b>Place of treatment</b>                |     |      |
| Health facility                          | 6   | 40   |
| Traditional healers' home                | 9   | 60   |
| <b>Overall practice on LF disease</b>    |     |      |
| Poor                                     | 190 | 78.2 |
| Good                                     | 53  | 21.8 |

265

266 **4.0 Discussion**

267 This study revealed that although the communities in the study area are  
268 endemic for LF, majority of the population are unaware of the disease,  
269 signifying that information and awareness creation on the disease remains  
270 very low in these communities. Awareness creation would allow the  
271 population to have specific knowledge, for example, on the causal agent and  
272 the routes of transmission of the disease. In the present study, we found that  
273 the population lacked the knowledge or had wrong knowledge of the causal  
274 agent of LF. For instance, respondents attributed the cause of LF to  
275 numerous reasons unrelated to the cause of the disease. This included  
276 reasons such as eating contaminated food, sexual intercourse, or dirty  
277 environment, rather than to the actual cause which is filarial worms in  
278 mosquito bites. Our findings on misconception about causes of LF  
279 corroborates findings from a previous study carried out in Benue state,  
280 Nigeria where majority in the study reported causes of LF as lack of  
281 personal hygiene, walking long distances, stepping on charm (13).

282 Our findings also showed that majority of the respondents did not know that  
283 LF is a communicable disease, which suggests that precautionary measures  
284 may not be taken against the disease by many members of the affected  
285 community thereby increasing the risk of transmission. Similar high lack of  
286 knowledge on the transmission of the LF disease is common in other  
287 endemic countries such as India, where a study reported a populations' lack  
288 of knowledge on filariasis as a communicable disease (14). Only about 27% of  
289 respondents in our study knew that LF is transmitted by mosquito bites.

290 Lack of knowledge of transmission agent for LF can pose a challenge to  
291 combating or implementing effective vector control measures. For example,  
292 the population would not see the need for use of mosquito nets to protect  
293 against mosquito bites in the household. It was also observed that only one-  
294 third of the study participants knew that avoiding mosquito bites can help to  
295 prevent LF (33.2%). Our findings is similar with other studies in India and  
296 Nepal where knowledge about the vector for LF is still rife, especially in the  
297 rural areas (15)(16). Another study have also reported that many LF endemic  
298 communities do not know the significance of reducing contact with  
299 mosquitos to prevent LF (17).

300 Lack of adequate knowledge on simple preventive measures such as use of  
301 insecticide treated nets/ insecticide to prevent mosquito bites, taking of drugs  
302 during the MDA program put the community at increased risk of the  
303 disease. About one third (36.6%) of the respondents know about the MDA to  
304 prevent LF while 42% do not know LF prevention measures. However, these  
305 findings are contrary to the findings of a study in Plateau state, Nigeria  
306 where the majority reported that MDA and vector control can be used to  
307 prevent LF (6). There is therefore the need to increase awareness and  
308 coverage of the MDA in the study area. If adequate knowledge of prevention  
309 is lacking, then control measures will be inappropriate, this will in turn make  
310 control efforts targeted at the disease ineffective (14) .

311 Concerning respondents' attitude towards LF, we found that although about  
312 6.2% of the sample reported ever being sick or had relations sick from LF,  
313 most respondents felt it was important to treat. Unfortunately, the

314 perception of being at risk of the disease amongst the sample was quite poor  
315 as 76.6% did not think they were at risk of getting the disease. This finding is  
316 similar to results from the study in Plateau state where about half of study  
317 participants did not feel they were at risk of being infected with the disease  
318 (6). Another study in Taraba state Nigeria had a similar finding where  
319 respondents did not consider themselves susceptible to the disease (18). This  
320 low level of perceived risk may be associated with the overall low  
321 knowledge of the disease in the study area. This study showed that many of  
322 the respondents did not receive drugs during the last MDA mainly because  
323 of lack of knowledge of the MDA program. This is however in contrast to a  
324 study carried out in Telangana State of India where the majority (88%) of the  
325 respondents consumed DEC tablets during MDA because majority knew  
326 about MDA in their community (14).

## 327 **5. Conclusion**

328 The study has shown that knowledge of LF in the communities surveyed  
329 was generally low, especially as regards the mode of transmission. Half of  
330 the study participants do not know the symptoms; a considerable proportion  
331 does not know the prevention and control measures. The role of mosquitoes  
332 in the transmission of the disease is not well understood hence not much is  
333 done by community members to prevent mosquito bites. The survey showed  
334 coverage of MDA in the study area is very low but the people also do not  
335 understand the role of MDA to prevent and control the disease. There is a  
336 need for increased awareness of the disease because a prevalence as high as  
337 21% reported by the state MOH and the poor knowledge found among the



338 study participants seem alarming. Awareness can be increased through  
339 health education on the causes, mode of transmission, symptoms,  
340 prevention, treatment, and control of the disease. The need for vector control  
341 and improved treatment coverage is imperative while emphasizing the goal  
342 of the MDA program to the communities.

343  
344 **Acknowledgments:** This study acknowledges the input of Dr. Olubukola Adebayo-  
345 Tosin in reviewing the manuscript to improve the outlook

346 **Conflicts of Interest:** The authors declare no conflict of interest.

347

#### 348 **References**

- 349 1. WHO. Lymphatic filariasis [Internet]. 2021 [cited 2022 Mar 2]. Available from: [https://www.who.int/news-](https://www.who.int/news-room/fact-sheets/detail/lymphatic-filariasis)  
350 [room/fact-sheets/detail/lymphatic-filariasis](https://www.who.int/news-room/fact-sheets/detail/lymphatic-filariasis)
- 351 2. Hotez PJ, Kamath A. Neglected tropical diseases in sub-Saharan Africa: Review of their prevalence,  
352 distribution, and disease burden. *PLoS Negl Trop Dis*. 2009;3(8):2–11.
- 353 3. Lustigman S, Prichard RK, Gazzinelli A, Grant WN, Boatman BA, McCarthy JS, et al. A Research Agenda for  
354 Helminth Diseases of Humans: The Problem of Helminthiasis. *PLoS Negl Trop Dis* [Internet]. 2012 [cited  
355 2021 Dec 21];6(4). Available from: <http://www.cnpq>.
- 356 4. Ndeffo-Mbah ML, Galvani AP. Global elimination of lymphatic filariasis. *Lancet Infect Dis* [Internet].  
357 2017;17(4):358–9. Available from: [http://dx.doi.org/10.1016/S1473-3099\(16\)30544-8](http://dx.doi.org/10.1016/S1473-3099(16)30544-8)
- 358 5. Ramaiah KD, Ottesen EA. Progress and Impact of 13 Years of the Global Programme to Eliminate Lymphatic  
359 Filariasis on Reducing the Burden of Filarial Disease. *PLoS Negl Trop Dis*. 2014;8(11).
- 360 6. Azzuwut MP, Sambo MN, Hadejia IS. Assessment of the knowledge, attitude and practices related to the  
361 treatment and prevention of lymphatic filariasis among the adult residents of Bokokos local government area  
362 of Plateau state, Nigeria. *Jos J Med*. 2012;6(3):16–8.
- 363 7. World Health Organization. Global Programme to Eliminate Lymphatic Filariasis. Annual Report on

- 364 Lymphatic Filariasis 2002. 2002.
- 365 8. Amaechi EC, Ohaeri CC, Ukpai OM, Nwachukwu PC, Ukoha UK. Lymphatic filariasis: knowledge, attitude  
366 and practices among inhabitants of an irrigation project community, North Central Nigeria. *Asian Pacific J*  
367 *Trop Dis.* 2016;6(9):709–13.
- 368 9. Haddix AC KA. Lymphatic filariasis: Economic aspects of the disease and programmes for its elimination.  
369 *Trans R Soc Trop Med Hyg.* 2000;94(6):592–593.
- 370 10. World Health Organization. Lymphatic filariasis: Reasons for Hope. In 1997.
- 371 11. Dogara M. Survey of knowledge, attitudes and perceptions (KAPs) of lymphatic filariasis patients in Kano  
372 State, Nigeria. *Int Res J Public Environ Heal* [Internet]. 2014;1(10):207–10. Available from:  
373 <http://www.journalissues.org/IRJPEH/http://dx.doi.org/10.15739/irjpeh.010>
- 374 12. Ibadan South West Local Government Area [Internet]. [cited 2021 Dec 28]. Available from:  
375 <https://www.manpower.com.ng/places/lga/678/ibadan-south-west>
- 376 13. Agbo OE, Ochanya OJ. Clinical epidemiology of lymphatic filariasis and community practices and  
377 perceptions amongst the Ado people of Benue State, Nigeria. Vol. 5, *African Journal of Infectious Diseases.*  
378 2011. p. 47–53.
- 379 14. Medoju A, Gedam CM, Lakshman SM. Knowledge, Attitude and Practices (KAP) about Lymphatic Filariasis  
380 and Perception Regarding Socio-Economic Status of Diseased Person among Inhabitants of Erstwhile  
381 Warangal District, Telangana State. 2019 [cited 2022 Jan 6];12(4):65–73. Available from:  
382 [www.ijsrm.humanjournals.com](http://www.ijsrm.humanjournals.com)
- 383 15. Shercand J, Obsomer Valerie TGD and HM, D. Mapping of lymphatic filariasis in Nepal. *Filaria J.* 2003;2(7).
- 384 16. Hopkins DR, Eigege A, Miri ES, Gontor I, Ogah G, Umaru J, et al. Lymphatic filariasis elimination and  
385 schistosomiasis control in combination with onchocerciasis control in Nigeria. *Am J Trop Med Hyg.*  
386 2002;67(3):266–72.
- 387 17. Wynd S, Melrose WD, Durrheim DN, Carron J, Gyapong M. Bulletin of the World Health Organization. *Bull*  
388 *World Health Organ.* 2007;85(6):493–8.
- 389 18. Ogonnaya LU, Okeibunor JC. Sociocultural Factors Affecting the Prevalence and Control of Lymphatic

390 Filariasis in Lau Local Government Area, Taraba State: <http://dx.doi.org/10.2190/AY5A-QAY4-6H8D-VEL7>

391 [Internet]. 2016 Aug 1 [cited 2022 Jan 6];23(4):341–71. Available from:

392 <https://journals.sagepub.com/doi/abs/10.2190/AY5A-QAY4-6H8D-VEL7>

393 **Supplemental Materials:**

394 **Authors Contributions:**

395 Conceptualization: Jaiyeola T.M.; methodology, Jaiyeola T.M and Udoh E.E.; validation, Jaiyeola T.M, Udoh  
396 E.E and Adebambo B.A; formal analysis, Jaiyeola T.M and Udoh. E.E; investigation, Adebambo B.A;  
397 resources, Jaiyeola T.M, Adebambo B.A.; data curation, Udoh E. E and Jaiyeola T.M.; writing—original draft  
398 preparation, Jaiyeola T.M.; writing— review and editing Udoh E.E and Jaiyeola T.M; visualization, Jaiyeola  
399 T.M, supervision, Udoh E.E.; project administration, Udoh E.E.; funding acquisition, Jaiyeola T.M and  
400 Adebambo B.A. All authors have read and agreed to the published version of the manuscript.

401 **Funding:** This research received no external funding

402 **Institutional Review Board Statement:** Ethical clearance was obtained from the Research ethical review  
403 committee board of the Oyo State ministry of health AD 13/479/4436<sup>A</sup>. Permission was sought from the  
404 authorities of the LGA. Survey started with the informed consent being read to each participant with the  
405 option of agreeing or not agreeing to participate in the survey. Those who agreed to participate were those  
406 who proceeded with the interview. All information obtained from the respondents was kept confidential.

407 The study was conducted in accordance with the Declaration of Helsinki, and approved by the Ethical review  
408 board of Oyo State Ministry of Health (protocol code AD 13/479/4436<sup>A</sup> and 31<sup>st</sup> August, 2021.

409 **Informed Consent Statement:** Informed consent was obtained from all subjects involved in the study

410 **Data Availability Statement:** Not applicable.
